# Supplementary material for: Effect of Different Hydrocolloids on the Qualitative Characteristics of Fermented Gluten-Free Quinoa Dough and Bread
Source: MDPI journal article supplement (doi:10.3390/foods13091382), 2024-04-30
Supplement: s1 [file s1]

**Supplementary Table S1. Classification of min and max of area (mm<sup>2</sup>) of objects (alveoli) for each class.**

| Class | Range of Area (mm <sup>2</sup> ) |       |
|-------|----------------------------------|-------|
|       | min                              | max   |
| 1     | 0.11                             | 3.78  |
| 2     | 3.78                             | 7.47  |
| 3     | 7.47                             | 11.16 |
| 4     | 11.16                            | 14.84 |
| 5     | 14.84                            | 18.53 |
| 6     | 18.53                            | 22.21 |
| 7     | 22.21                            | 25.90 |
| 8     | 25.9                             | 29.58 |
| 9     | 29.58                            | 33.27 |
| 10    | 33.27                            | 36.95 |
| 11    | 36.95                            | 99.99 |
